# Supplementary material
Source: PubMed Central journal article supplement (PMC1544222)
Supplement: pnas_0600750103_4.pdf [file pnas_0600750103_4.pdf]

**Table 1. Gene families examined in this study**

| <b>Gene family no.</b> | <b>cDNA no.</b> | <b>GenBank acc.</b> | <b>Gene name</b>              |
|------------------------|-----------------|---------------------|-------------------------------|
| 3                      | AT09807         | AY089299            | CG17110                       |
| 3                      | GH04054         | AY047532            | CG6465                        |
| 3                      | RE32110         | AY121680            | CG6738                        |
| 3                      | RE61589         | AY113542            | CG17109                       |
| 5                      | AT17811         | AY113277            | CG10026                       |
| 5                      | HL01515         | AY129433            | CG5973                        |
| 5                      | RE39480         | AY075483            | CG12926                       |
| 5                      | RE67755         | AY071631            | CG10300                       |
| 8                      | GH01960         | AY047516            | lethal (2) essential for life |
| 8                      | GM13686         | AY118471            | Hsp27                         |
| 8                      | LD11379         | AY069419            | Hsp26                         |
| 11                     | GH04080         | AY060617            | Bc                            |
| 11                     | GH07976         | AY060652            | CG8193                        |
| 11                     | SD09866         | AY061624            | Dox-A3                        |
| 14                     | GH12103         | BT003617            | skf                           |
| 14                     | RE01835         | BT003550            | Caki                          |
| 14                     | RH61449         | AY121709            | CG9326                        |
| 17                     | GH13725         | AY051470            | CG8231                        |
| 17                     | LD20933         | AY089543            | Ccty                          |
| 17                     | RE61939         | AY128484            | CG5525                        |
| 17                     | RE70560         | AY118416            | T-cp1                         |
| 18                     | GH13950         | AY051473            | $\alpha$ -Est7                |
| 18                     | RE02195         | AY128457            | CG10175                       |
| 18                     | RE07760         | AY070981            | $\alpha$ -Est4                |
| 20                     | GH14950         | AY051496            | Tsp42Ei                       |
| 20                     | LP02831         | AY118995            | Tsp42Ec                       |
| 20                     | RE12209         | AY075454            | Tsp42Ee                       |
| 20                     | RE57845         | AY071541            | lbn                           |
| 24                     | GH21837         | AY060329            | CG1698                        |
| 24                     | GH22929         | AY051579            | DAT                           |
| 24                     | RE10485         | AY071023            | SerT                          |
| 24                     | RE10560         | AY121662            | CG3252                        |
| 24                     | RE14652         | AY113413            | CG5226                        |
| 24                     | RE33779         | BT003509            | CG4476                        |
| 24                     | RE30213         | BT010000            | CG1732                        |
| 31                     | GH28342         | AY060813            | CG1773                        |
| 31                     | LD25830         | AY061333            | CG11836                       |
| 31                     | LP06090         | AY119037            | CG10745                       |
| 31                     | RE08710         | AY095066            | CG16749                       |
| 31                     | RE37738         | AY113462            | CG9673                        |
| 31                     | RE69176         | AY070589            | $\lambda$ Try                 |
| 31                     | RE74144         | AY071658            | CG6467                        |
| 32                     | GM02466         | AY102668            | Jonah 65Aiv                   |

---

|    |         |          |             |
|----|---------|----------|-------------|
| 32 | RE58316 | AY113501 | Ahcy89E     |
| 32 | RE06911 | BT010277 | CG9977      |
| 43 | GM13604 | AY069280 | Pros25      |
| 43 | LD33318 | AY061404 | ProsMA5     |
| 43 | RE23081 | AY071178 | Pros35      |
| 43 | RE28175 | AY071241 | Pros28.1    |
| 45 | HL01062 | AY119564 | CG10960     |
| 45 | RE31553 | AY071288 | CG15407     |
| 45 | RH04286 | BT003466 | CG30035     |
| 49 | LD04994 | AY089535 | Act57B      |
| 49 | RE02927 | AY089562 | Act5C       |
| 49 | RE14441 | AY089587 | Act57B      |
| 49 | RH04757 | AY070666 | Arp87C      |
| 57 | LD29185 | AY094809 | Act87E      |
| 57 | RE02160 | AY070906 | CG6560      |
| 57 | RE16882 | AY071116 | Arf51F      |
| 59 | LP02712 | AY118991 | EG:103B4.2  |
| 59 | RE09630 | AY119109 | CG12268     |
| 59 | RE20520 | BT010010 | CG17562     |
| 60 | LP04804 | AY119022 | CG7881      |
| 60 | LP07366 | AY119060 | CG8791      |
| 60 | RE01809 | AY095062 | CG4726      |
| 60 | RE15779 | AY071092 | NaPi-T      |
| 60 | RE49527 | AY071412 | CG2003      |
| 60 | RE35348 | BT010253 | CG15094     |
| 61 | RE01566 | AY118355 | CG17905     |
| 61 | RE22242 | BT003524 | CG8748      |
| 61 | RE51076 | AY113493 | CG17905     |
| 62 | RE02508 | AY070915 | CG9717      |
| 62 | RE29477 | AY071258 | Esp         |
| 62 | RE31140 | AY071282 | CG6125      |
| 63 | RE03785 | AY070939 | Ugt36Bc     |
| 63 | RE29447 | AY071256 | CG15569     |
| 63 | RE52038 | AY071432 | Ugt37b1     |
| 65 | RE05521 | AY070953 | CG31002     |
| 65 | RE33457 | AY071308 | Ugt37b1     |
| 65 | RH39533 | AY070704 | ACBP domain |
| 67 | RE09178 | AY089573 | CG6723      |
| 67 | RE18886 | AY089594 | CG2191      |
| 67 | RH60839 | AY118634 | CG9657      |
| 68 | RE09259 | AY071014 | CG2191      |
| 68 | RE32113 | AY113448 | CG9657      |
| 68 | RE33063 | AY071303 | Lcp65Ac     |
| 68 | RE57116 | AY071520 | CG18493     |
| 68 | RH61147 | AY113609 | CG3734      |
| 70 | RE11624 | AY089583 | CG9953      |

---

---

|    |         |          |         |
|----|---------|----------|---------|
| 70 | RE36938 | AY084161 | CG3734  |
| 70 | RH04336 | AY070659 | Lip1    |
| 71 | RE12242 | AY089586 | CG17099 |
| 71 | RE54405 | AY075506 | CG18417 |
| 71 | RE24765 | BT003518 | CG17633 |
| 73 | RE13502 | AY071045 | CG4017  |
| 73 | RE71127 | AY070608 | CG12374 |
| 73 | RH39904 | AY118431 | Gld     |
| 73 | RH58587 | AY071750 | CG9517  |
| 77 | RE20037 | AY084122 | CG9522  |
| 77 | RE28171 | AY122229 | CG9514  |
| 77 | RE36204 | AY113456 | CG9503  |
| 77 | RE61267 | AY128482 | CG9518  |
| 77 | RE09982 | BT010022 | CG13160 |
| 77 | RE11240 | BT010274 | CG11961 |
| 82 | RE35807 | AY121683 | CG9416  |
| 82 | LD02432 | BT010302 | CG11961 |
| 82 | RE28322 | AY118383 | CG9416  |

---
