# Supplementary material
Source: PubMed Central journal article supplement (PMC1544222)
Supplement: pnas_0600750103_5.pdf [file pnas_0600750103_5.pdf]

**Table 2. Discrete expression regions for genes examined in this study.**

| ID | Region name                        | System or tissue | Chi-square test* | Loss/gain ratio <sup>†</sup> |
|----|------------------------------------|------------------|------------------|------------------------------|
| 1  | Central nervous system             | Nervous system   | 0.5013           | 1.511775                     |
| 2  | Brain                              | Nervous system   | 1.77532          | 3.324505                     |
| 3  | Central brain                      | Nervous system   | <b>2.98697</b>   | 9.340479                     |
| 4  | Central brain neuron               | Nervous system   | 0.014            | 1.104827                     |
| 5  | Central brain glia                 | Nervous system   | 0.7241           | 1.926697                     |
| 6  | Central brain surface glia         | Nervous system   | 0.26666          | 3.547929                     |
| 7  | Central brain mushroom body        | Nervous system   |                  |                              |
| 8  | Central brain pars intercerebralis | Nervous system   |                  |                              |
| 9  | Embryonic optic lobe               | Nervous system   |                  |                              |
| 10 | Inner optic lobe                   | Nervous system   |                  |                              |
| 11 | Outer optic lobe                   | Nervous system   |                  |                              |
| 12 | Head epidermis                     | Nervous system   | 0.6987           | 1.599832                     |
| 13 | Sensory system head                | Nervous system   | 1.69715          | 2.266526                     |
| 14 | Bolwig's organ                     | Nervous system   |                  |                              |
| 15 | Adult eye primordium               | Nervous system   |                  |                              |
| 16 | Antennal sense organ               | Nervous system   | 0.33829          | 8.024047                     |
| 17 | Dorsal pouch                       | Nervous system   | 0.526            | 2.122427                     |
| 18 | Stomatogastric nervous system      | Nervous system   | <b>1.98122</b>   | 5.999993                     |
| 19 | Frontal ganglion                   | Nervous system   | <b>1.98122</b>   | 5.999993                     |
| 20 | Hypocerebral ganglion              | Nervous system   |                  |                              |
| 21 | Esophageal ganglion                | Nervous system   |                  |                              |
| 22 | Proventricular ganglion            | Nervous system   |                  |                              |
| 23 | Foregut                            | Digestive system | 1.0219           | 3.066064                     |
| 24 | Epipharynx                         | Digestive system | 0.66414          | 2.500005                     |
| 25 | Adult clypeo-labral primordium     | Digestive system |                  |                              |
| 26 | Labral sensory complex primordium  | Digestive system | 0.17654          | 2.265953                     |
| 27 | Hypopharynx                        | Digestive system | 1.37099          | 3.075508                     |
| 28 | Esophogus                          | Digestive system | 0.3349           | 1.4                          |
| 29 | Proventriculus                     | Digestive system | <b>2.53711</b>   | 3.438024                     |
| 30 | Proventriculus inner layer         | Digestive system | 0.91205          | 1.788321                     |
| 31 | Proventriculus intermediate layer  | Digestive system |                  |                              |
| 32 | Proventriculus outer layer         | Digestive system | 1.38041          | 2.093052                     |
| 33 | Adult foregut precursor            | Digestive system |                  |                              |
| 34 | Atrium                             | Digestive system |                  |                              |
| 35 | Foregut sensory structure          | Digestive system | 0.33939          | 7.388359                     |
| 36 | Maxillary sensory complex          | Other            | 0.33939          | 7.388359                     |
| 37 | Labial sensory complex             | Other            | 0.33939          | 7.388359                     |
| 38 | Salivary gland                     | Digestive system | <b>2.18451</b>   | 3.117826                     |
| 39 | Salivary gland body                | Digestive system | 0.25771          | 3.350346                     |
| 40 | Salivary gland duct                | Digestive system | 1.38763          | 3.37883                      |
| 41 | Salivary gland common duct         | Digestive system | 1.38763          | 3.37883                      |
| 42 | Adult salivary primordium          | Digestive system |                  |                              |
| 43 | Ventral epidermis                  | Other            | 0.8964           | 1.571426                     |
| 44 | Anal pad                           | Digestive system | 0.33979          | 2                            |
| 45 | Ventral apodeme                    | Muscle system    |                  |                              |
| 46 | Ventral imaginal precursor         | Discs            |                  |                              |

|    |                                    |                    |                |          |
|----|------------------------------------|--------------------|----------------|----------|
| 47 | Labial disc                        | Discs              | 0.35963        | 5.000009 |
| 48 | Dorsal mesothoracic disc           | Discs              |                |          |
| 49 | Ventral thoracic disc              | Discs              |                |          |
| 50 | Genital disc                       | Discs              |                |          |
| 51 | Ventral sensory complex primordium | Other              | <b>2.35847</b> | 6.832611 |
| 52 | Ventral nerve cord                 | Nervous system     | 0.947          | 1.63635  |
| 53 | Lateral cord                       | Nervous system     | 1.4326         | 2.146849 |
| 54 | Lateral cord neuron                | Nervous system     | 0.4655         | 1.574421 |
| 55 | Lateral cord glia                  | Nervous system     | 1.7936         | 2.459465 |
| 56 | Lateral cord surface glia          | Nervous system     | 1.79901        | 4.929445 |
| 57 | Ventral midline                    | Nervous system     | 1.6358         | 2.088228 |
| 58 | Ventral midline glia               | Nervous system     | <b>2.09304</b> | 2.999993 |
| 59 | Ventral midline neuron             | Nervous system     | 0.74368        | 6.995266 |
| 60 | Dorsal epidermis                   | Other              | 1.5775         | 1.694738 |
| 61 | Oenocyte                           | Other              | 0.1812         | 0.455918 |
| 62 | Dorsal imaginal precursor          | Discs              |                |          |
| 63 | Dorsal histoblast nest abdominal   | Other              |                |          |
| 64 | Sensory nervous system primordium  | Nervous system     | <b>2.1671</b>  | 3        |
| 65 | Leading edge cell                  | Other              |                |          |
| 66 | Tracheal system                    | Tracheal system    | 0.9773         | 1.641112 |
| 67 | Anterior spiracle                  | Tracheal system    |                |          |
| 68 | Posterior spiracle                 | Tracheal system    | <b>2.2556</b>  | 2.861584 |
| 69 | Dorsal trunk                       | Tracheal system    | 1.69807        | 2.749999 |
| 70 | Dorsal branch                      | Tracheal system    | 0.33977        | 2        |
| 71 | Visceral branch                    | Tracheal system    | 0.33977        | 2        |
| 72 | Tracheole                          | Tracheal system    | 0.52325        | 2.999993 |
| 73 | Imaginal tracheal precursor        | Tracheal system    |                |          |
| 74 | Amnioserosa                        | Other              | 0.75252        | 4.032823 |
| 75 | Midgut                             | Digestive system   | 0.0116         | 1.047618 |
| 76 | Gastric caecum                     | Digestive system   | 0.82281        | 2.32451  |
| 77 | Midgut chamber                     | Digestive system   | 1.1001         | 1.751238 |
| 78 | Cuprophilic cell                   | Digestive system   | 1.47234        | 3.534418 |
| 79 | Midgut interstitial cell           | Digestive system   | 0.52325        | 3        |
| 80 | Adult midgut precursor             | Digestive system   |                |          |
| 81 | Hind gut                           | Digestive system   | <b>4.9419</b>  | 3.004618 |
| 82 | Malphigian tubule primordium       | Digestive system   |                |          |
| 83 | Main segment of Malphigian tubule  | Digestive system   | 0.17557        | 2.304294 |
| 84 | Malphigian tubule tip cell         | Digestive system   | 0.56503        | 5.815178 |
| 85 | Small intestine                    | Digestive system   | 0.73342        | 3.041132 |
| 86 | Large intestine                    | Digestive system   | <b>1.9302</b>  | 2.609647 |
| 87 | Rectum                             | Digestive system   | 0.34053        | 2.010203 |
| 88 | Adult hindgut precursor            | Digestive system   | 1.75356        | 4.247417 |
| 89 | Hemocyte                           | Circulatory system | 1.09739        | 5.706177 |
| 90 | Macrophage                         | Circulatory system |                |          |
| 91 | Crystal cell                       | Circulatory system | 0.5303         | 1.65012  |
| 92 | Garland cell                       | Circulatory system | 0.96685        | 2.25     |
| 93 | Garland cell primordium            | Circulatory system |                |          |
| 94 | Paracardial cell SA                | Circulatory system |                |          |
| 95 | Circulatory system                 | Circulatory system |                |          |
| 96 | Dorsal vessel                      | Circulatory system | 0.66414        | 2.5      |

|     |                                      |                     |                |          |
|-----|--------------------------------------|---------------------|----------------|----------|
| 97  | Lymph gland                          | Circulatory system  | 1.13233        | 4.908473 |
| 98  | Muscle system                        | Muscle system       | 0.4366         | 1.977611 |
| 99  | Dorsal prothoracic pharyngeal muscle | Muscle system       | 0.04552        | 1.200002 |
| 100 | Somatic muscle                       | Muscle system       | 0.04552        | 1.200002 |
| 101 | Adult muscle precursor primordium    | Muscle system       |                |          |
| 102 | Visceral muscle                      | Muscle system       | 0.00243        | 1.052779 |
| 103 | Longitudinal visceral muscle fibers  | Muscle system       |                |          |
| 104 | Circular visceral muscle fibers      | Muscle system       |                |          |
| 105 | Fat body                             | Fat body            | <b>2.2986</b>  | 2.947986 |
| 106 | Gonad                                | Reproductive system | 0.82283        | 2.33333  |
| 107 | Gonadal sheath                       | Reproductive system |                |          |
| 108 | Germ cell                            | Reproductive system | 1.4849         | 2.399995 |
| 109 | Endocrine system                     | Endocrine system    | <b>2.29627</b> | 4.614959 |
| 110 | Ring gland                           | Endocrine system    | 0.12782        | 2.224144 |
| 111 | Embryonic corpus allatum             | Endocrine system    |                |          |
| 112 | Corpus cardiacum                     | Endocrine system    |                |          |
| 113 | Prothoracic gland                    | Endocrine system    |                |          |
| 114 | Dorsomedial neurosecretory cell      |                     |                |          |
| 115 | Embryonic Malpighian tubule          | Digestive system    | <b>3.5783</b>  | 2.416673 |

\*Chi test is log likelihood of two-rate model minus log-likelihood of one-rate model.  
 Bold denotes significant support for two-rate model. Some likelihood values could not be calculated because of insufficient data from single expression domains.

†Loss/gain ratio is from parameter estimates of two-rate model.
