# Supplementary material
Source: PubMed Central journal article supplement (PMC1544222)
Supplement: pnas_0600750103_6.pdf [file pnas_0600750103_6.pdf]

**Table 3. Gene Ontology (GO) for genes used in final analyses**

| Biological process or biochemical function            | Count* |
|-------------------------------------------------------|--------|
| Physiological process                                 | 99     |
| Cellular physiological process                        | 91     |
| Establishment of localization                         | 37     |
| Biopolymer metabolism                                 | 33     |
| Catabolism                                            | 29     |
| Macromolecule catabolism                              | 29     |
| Cellular catabolism                                   | 28     |
| Cellular protein catabolism                           | 28     |
| Proteolysis and peptidolysis                          | 28     |
| Cellular macromolecule catabolism                     | 28     |
| Hydrolase activity                                    | 43     |
| Transporter activity                                  | 36     |
| Peptidase activity                                    | 28     |
| Oxidoreductase activity                               | 13     |
| Carrier activity                                      | 12     |
| Serine-type peptidase activity                        | 12     |
| Coenzyme binding                                      | 11     |
| Electrochemical potential-driven transporter activity | 11     |
| Cofactor binding                                      | 11     |
| Porter activity                                       | 11     |

\*Top 10 counts are reported.
