# Supplementary material
Source: PubMed Central journal article supplement (PMC1544222)

Rate of Loss

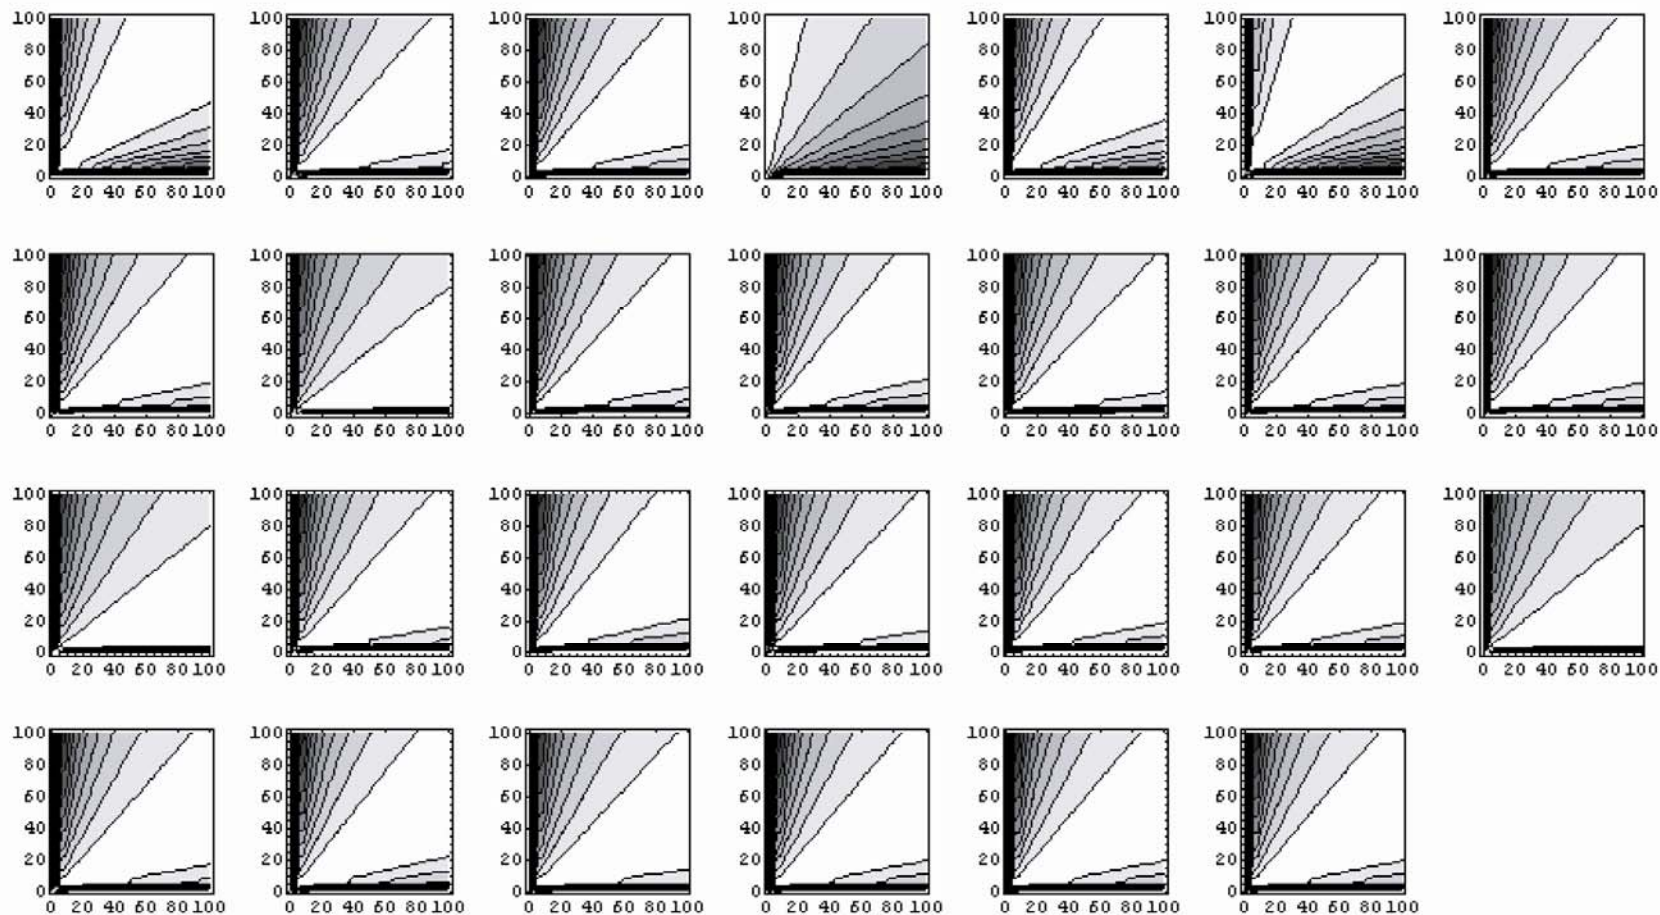

Rate of Loss

Supplement: pnas_0600750103_1.pdf [file pnas_0600750103_1.pdf]

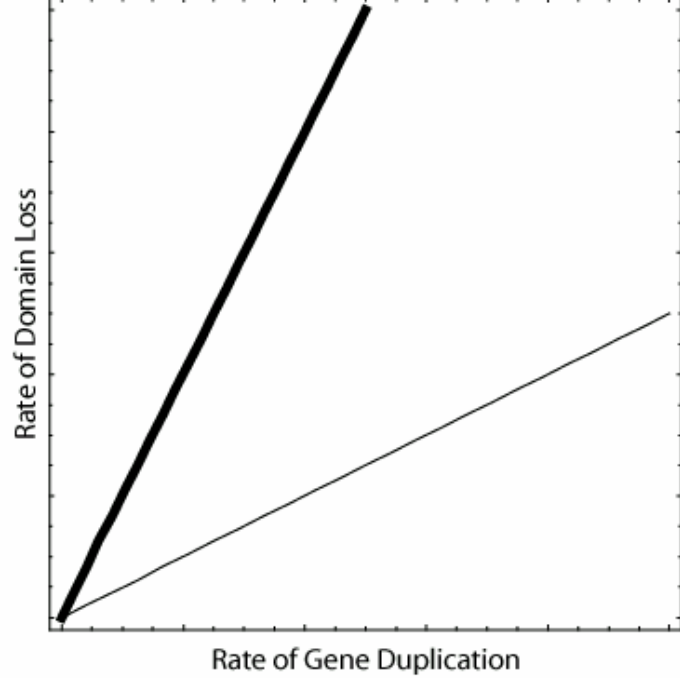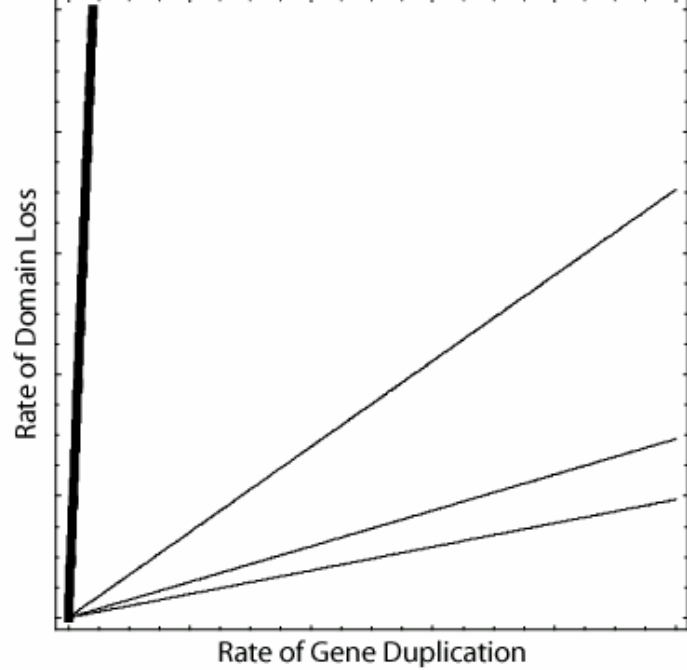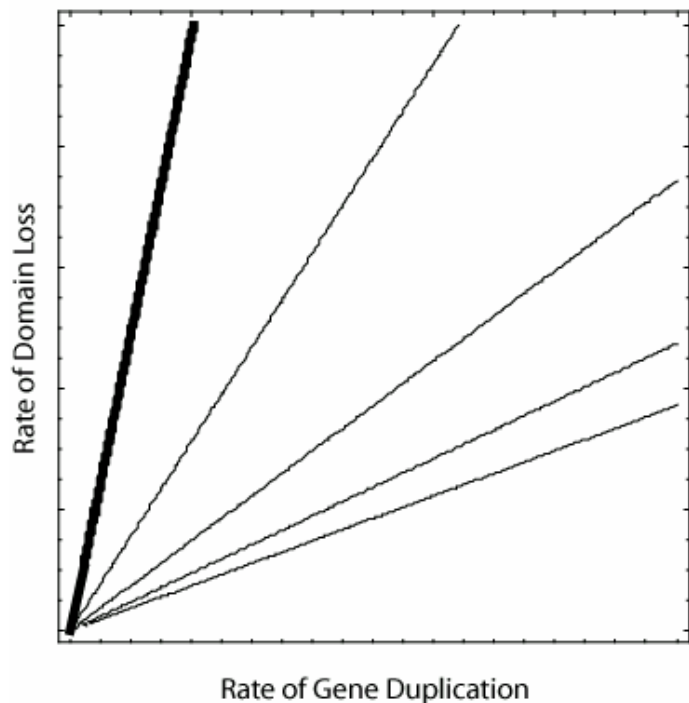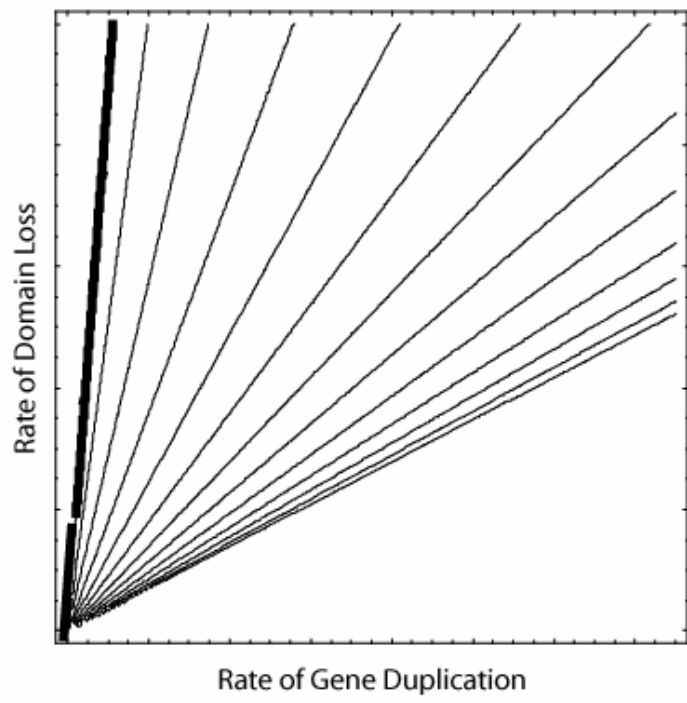

Supplement: pnas_0600750103_2.pdf [file pnas_0600750103_2.pdf]

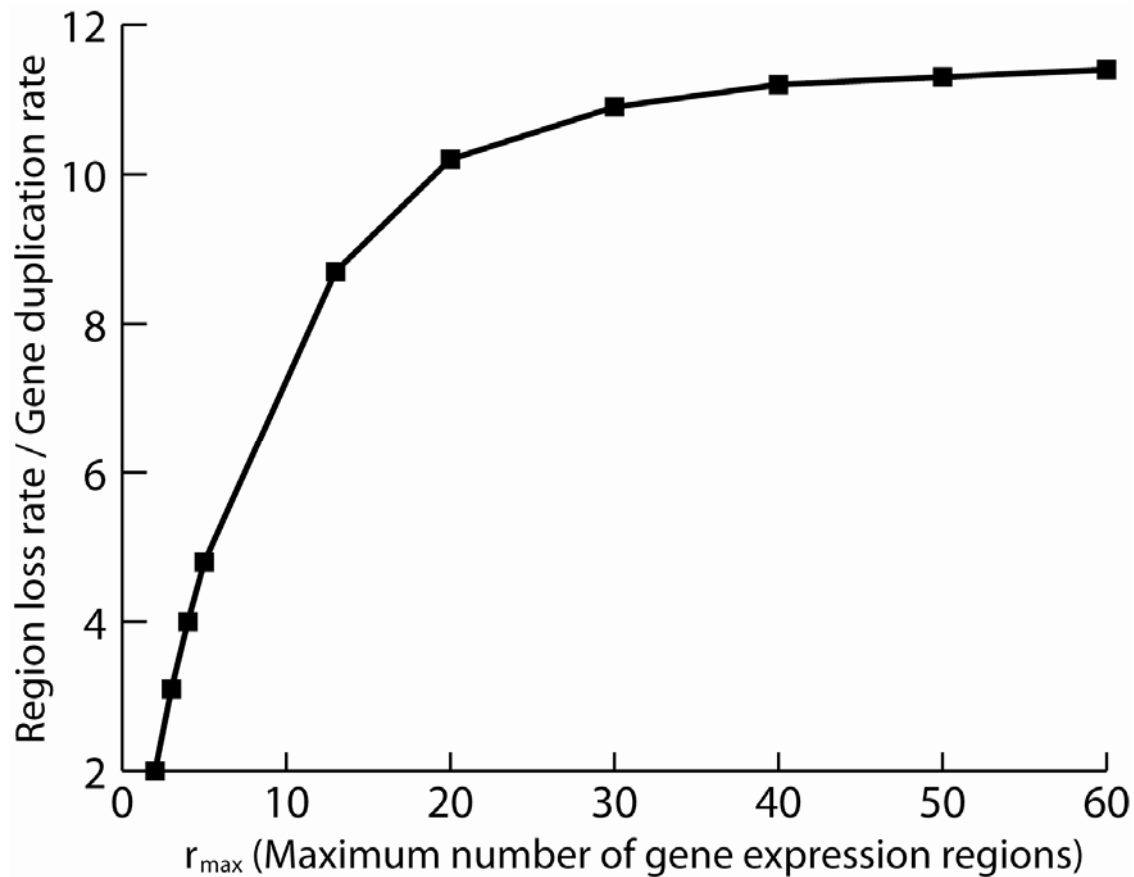

Supplement: pnas_0600750103_3.pdf [file pnas_0600750103_3.pdf]
